# Supplementary material for: Differential gene expression response of synovial fibroblasts from temporomandibular joints and knee joints to dynamic tensile stress
Source: Springer Nature journal article supplement (doi:10.1007/s00056-021-00309-y), 2021-06-17
Supplement: MOESM1 [file 19269114]

**Supplemental Figure 1** Analysis of expression of fibroblast specific genes (*Cdh11*, *Cd248*) and absence of marker genes for osteoblasts, macrophages, osteoclasts and myogenic cells (*Bglap*, *Cd68*, *Itga7*, *MyoD1*, *Des*) in primary cell cultures of knee synovial tissue explants (a) as well as TMJ-dissected synovial tissue (b)

**Ergänzende Abbildung 1** Analyse der Expression von Fibroblasten-spezifischen Genen (*Cdh11*, *Cd248*) und Abwesenheit von Markergenen für Osteoblasten, Makrophagen, Osteoklasten und myogene Zellen (*Bglap*, *Cd68*, *Itga7*, *MyoD1*, *Des*) in primären Zellkulturen von Knie-(a) sowie von TMJ-synovialen Gewebe (b)

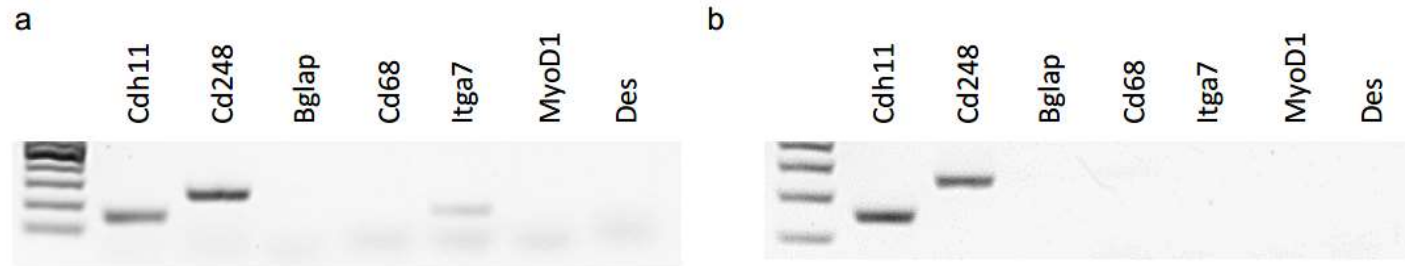

**Supplemental Table 1** Primers used for semiquantitative PCR analysis in murine synovial fibroblasts**Ergänzende Tabelle 1** Verwendete Primer für die semiquantitative PCR-Analyse in murinen synovialen Fibroblasten

| Gene symbol  | Gene name                                | 5'-forward primer-3'   | 5'-reverse primer-3'    | Genebank accession number | Amplicon size, T <sub>m</sub> , GC% |
|--------------|------------------------------------------|------------------------|-------------------------|---------------------------|-------------------------------------|
| <i>Cdh11</i> | cadherin 11 [54]                         | AGGACGACACAGCCAATGGAC  | AAGTCCTGCTTCTGCCGACTG   | NM_009866.5               | 148 bp, 62°C, 57                    |
| <i>Cd248</i> | CD248 antigen, endosialin [26]           | GCCAGCAGATGTGTGTCAA    | GTAGGTGCCAGCCATAGGAT    | NM_054042.2               | 238 bp, 58°C, 52-55                 |
| <i>Bglap</i> | bone gamma-carboxyglutamate protein [26] | GCTCTGTCTCTGACCTCACA   | TAGATGCGTTTGTAGGCGG     | NM_007541.3               | 231 bp, 61°C, 54-52                 |
| <i>Cd68</i>  | CD68 antigen [26]                        | GCTTCTGCTGTGGAAATGC    | GGTAGGTTGATTGTCGTCTGC   | NM_001291058.1            | 234 bp, 59°C, 52                    |
| <i>Itga7</i> | integrin alpha 7                         | TTTGGGTTCTGTGACAGGGC   | AGCTGGTCAGGGTCTGAGCTATC | NM_008398.2               | 137 bp, 63°C, 57-56                 |
| <i>MyoD1</i> | myogenic differentiation 1               | ACTACAGTGGCGACTCAGATGC | GTGTCGTAGCCATTCTGCCG    | NM_010866.2               | 109 bp, 62°C, 54-60                 |
| <i>Des</i>   | desmin                                   | AACTCCGAGAAACCAGCCCC   | GTTGCTGTGAGCCTCGCTG     | NM_010043.2               | 118 bp, 62°C, 57-60                 |
